# Reproductive compensation and embryo competition drive the evolution of polyembryony

November 17, 2020

## **Institutional affiliations**

Yaniv Brandvain: Department of Plant and Microbial Biology, University of Minnesota, St. Paul, Minnesota 55108

Alexander Harkness: Department of Ecology, Evolution, and Behavior, University of Minnesota, St. Paul, Minnesota 55108

Tanja Pyhäjärvi: Department of Ecology and Genetics, University of Oulu, FI-90014 Oulu, Finland.

## **Corresponding author contact details**

Corresponding author: Yaniv Brandvain. 1500 Gortner Ave. St. Paul, MN, USA 55108. [ybrandva@umn.edu](mailto:ybrandva@umn.edu)

## **Keywords**

Self-Incompatibility

Polyembryony

Sibling Rivalry

## Abstract

1  
2  
3  
4  
5  
6  
7  
8  
9  
10  
11  
12  
13  
14  
15  
16  
17  
18  
19  
20  
21  
22  
23  
24  
25  
26

Simple polyembryony – where a single gametophyte produces multiple embryos with different sires but the same maternal haplotype – is common in conifers, ferns, horsetails and other vascular plants. Polyembryony could be favored as a mechanism of reproductive compensation, providing a backup for inviable embryos, or as a mechanism of embryo competition and eliminating plants with low fitness, perhaps acting as a mechanism of Self-Incompatibility (SI). However as the evolution of polyembryony from monoembryony has not been modeled these long standing verbal models have not been evaluated. We develop an infinite-site, forward population genetics model to test how these factors can favor the evolution of polyembryony, and how these underlying benefits of polyembryony shape the genetic load under a range of selfing rates, dominance, and selection coefficients. We find that the benefit of reproductive compensation strongly favors the evolution of polyembryony, while the benefits of embryo competition are much weaker. Importantly, when embryo competition favors the evolution of polyembryony it increases embryo competitiveness, but does not act as an SI mechanism, as it does not effectively trade low-fitness selfed offspring for high fitness outcrossed offspring. We find that the impact of polyembryony on the genetic load depends on its function – increasing the embryo load when acting as a mechanism of embryo compensation and decreasing the embryo load when acting as a mechanism of competition.

27 Nature is, above all, profligate. Don't believe them when they  
28 tell you how economical and thrifty nature is.

29 – Annie Dillard 1974.

30 Not only do most parents produce more offspring than will survive, but  
31 most organisms that provide parental care make more offspring than they  
32 will likely be able to nurture to independence. Frequent siblicide in the great  
33 egret, *Casmerodius albus*, provides a dramatic example of this – siblings kill  
34 one another, presumably over the ability to monopolize small food items  
35 (Mock 1984); Why then do egret mothers continue laying eggs that will  
36 develop into offspring that will kill one another? Could such overproduction  
37 allow parents to screen for offspring quality (Forbes and Mock 1998), or  
38 does the “diverse portfolio” of offspring born over the breeding season allow  
39 parents to hedge their bets (Forbes 2009)?

40 Simple polyembryony provides an even more extreme, but perhaps less  
41 dramatic, example of this problem. With simple polyembryony, a single ma-  
42 ternal gametophyte is fertilized by multiple sperm cells to produce multiple  
43 embryos with genetically identical maternally derived genomes but distinct  
44 paternal genomes (Buchholz 1922; Schnarf 1937, cited in Dogra 1967). Here  
45 we present an infinite sites forward-in-time population genomic simulation  
46 to test the *competition* (akin to egret mothers screening for offspring qual-  
47 ity) and *compensation* (akin to egret mothers hedging their bets) theories  
48 for the evolution of polyembryony, and to investigate how polyembryony  
49 changes the genetic architecture of embryonic and postembryonic fitness.

50 Simple polyembryony is ubiquitous in gymnosperms (Willson and Bur-  
51 ley 1983), and is found in many seedless vascular plants including ferns and  
52 horsetails (Buchholz 1922). The number of archegonia per seed typically

53 varies from two to four in the genus *Pinus*, but can reach up to 200 (as re-  
54 ported in *Widdringtonia juniperoides* Saxton 1934). In gymnosperms, from  
55 this base of numerous archegonia, typically only a single embryo survives in  
56 mature seed (Chamberlain 1966).

57 Evolutionary theorists have investigated the evolutionary consequences  
58 of polyembryony – specifically how polyembryony (or less mechanistically  
59 explicit forms of reproductive compensation) could shape the genetic load  
60 (Latta 1995; Sakai 2019; Porcher and Lande 2005; Kärkkäinen et al. 1996)  
61 and the exposure of inbreeding depression (Kärkkäinen and Savolainen 1993;  
62 Hedrick et al. 1999). However, theories for the evolutionary origin of sim-  
63 ple polyembryony are less well developed. Here, we develop theory for the  
64 evolution of simple polyembryony. We do not consider cleavage polyembry-  
65 ony, in which a fertilized zygote can split into numerous genetically identical  
66 embryos (Agapito-Tenzen et al. 2012), or nucellar polyembryony, in which  
67 maternal tissue asexually develops into embryos (Lakshmanan and Ambe-  
68 gaokar 1984), sometimes competing with sexually derived embryos, as they  
69 are likely favored by distinct mechanisms (Ganeshaiah et al. 1991).

70 We consider the two major advantages of simple polyembryony described  
71 by Kärkkäinen and Savolainen (1993): reproductive compensation – im-  
72 proved seed set, and embryo competition – the potentially improved post-  
73 embryonic fitness of surviving embryos compared to the projected fitness  
74 of unsuccessful embryos (Sorensen 1982; Porcher and Lande 2005). Repro-  
75 ductive compensation is an increase in seed set that occurs when embryo  
76 mortality is counteracted by an expanded supply of embryos. Polyembryony  
77 provides reproductive compensation if a lone embryo is less likely to develop  
78 into a successful seed than is a collection of sibling embryos. So, for exam-  
79 ple, if a proportion  $p$  of embryos are inviable, a second embryo increases the

80 probability that a seed contains a surviving embryo from  $1 - p$  to  $1 - p^2$   
81 (Lindgren 1975).

82 Alternatively, if embryonic and post-embryonic fitness are positively cor-  
83 related, embryo competition (dubbed Developmental Selection by Buchholz  
84 (1922)), could favor the evolution of polyembryony. Such a correlation can  
85 arise either through pleiotropy across the life cycle, or if embryonic fitness  
86 determined by one set of loci predicted post-embryonic fitness produced by  
87 another set of loci. This latter option seems particularly likely if inbred  
88 offspring are unfit across the life cycle, and as such, simple polyembryony  
89 is often interpreted as an inbreeding avoidance mechanism (e.g. Dogra  
90 1967; Sorensen 1982) analogous to the self-incompatibility systems (here-  
91 after SI) found in angiosperms. Koski (1971) and others contend that this  
92 gives way to evolution of the so-called “Embryo Lethal System” – an ap-  
93 parently coordinated self destruction mechanism revealed upon inbreeding  
94 (Koski 1971; Sarvas 1962, e.g. page 162 onwards ) in pines – as a mech-  
95 anism evolved to prevent selfing. Under this model, polyembryony does  
96 not prevent self-fertilization *per se*, but dampens self-fertilization’s deleter-  
97 ious effects by allowing competition and something of a maternal choice  
98 among the selfed and outcrossed progeny before major maternal resource  
99 allocation (Willson and Burley 1983; Sorensen 1982). This potential form  
100 of postzygotic mate choice could circumvent the constraint imposed by the  
101 unenclosed gymnosperm seed, which precludes prezygotic mate choice (e.g.  
102 SI systems Dogra 1967; Sorensen 1982; Willson and Burley 1983).

103 Critically, the embryo competition model assumes that possibility of ef-  
104 fective competition between embryos in a seed, a topic of much debate.  
105 Based on extensive experimental work on *P. sylvestris*, Sarvas (1962) stated  
106 that embryo competition and “struggle for life” is quite apparent under mi-

107 crossopic observation. However, others argue that selfed embryo death pri-  
108 marily occurs after the dominant embryo is determined (Williams 2008), and  
109 embryo survival is determined by chance physical factors Williams (2007);  
110 Mikkola (1969), undercutting the embryo competition model. Empirical  
111 studies evaluating these ideas are quite rare, and the evidence from these  
112 studies is mixed. For example, O'Connell and Ritland (2005) conducted  
113 controlled pollinations with varying levels of self-pollen with *Thuja plicata*,  
114 and found that the effect of embryo competition became apparent with a  
115 probability of selfing (0.75), that exceeds reasonable estimates of the fre-  
116 quency of self-pollination in most conifers. However, subtle effects at lower  
117 selfing rates are plausible.

118 In addition to various selective forces favoring the evolution of polyem-  
119 bryony, polyembryony itself can have striking evolutionary consequences.  
120 Previous models (Porcher and Lande 2005; Klekowski 1982; Sorensen 1982)  
121 examined the effect of reproductive compensation on the number of deleteri-  
122 ous mutations, mean population fitness, the extent of inbreeding depression,  
123 and the realized selfing rate. These models generally show that because re-  
124 moving selfed embryos early in development, polyembryony will prevent the  
125 effective purging of deleterious recessive mutations (Klekowski 1982; Haig  
126 1992), will increase the number of deleterious mutations at equilibrium, in-  
127 crease the extent of inbreeding depression, and decrease the realized selfing  
128 rate while increasing population mean fitness. As such, polyembryony is  
129 often suggested as an explanation for the joint observation of high inbreed-  
130 ing depression (gymnosperms have an estimated 5-10 lethal equivalents per  
131 haploid genome Lynch and Walsh 1998; Williams and Savolainen 1996) and  
132 low realized selfing rates in gymnosperms (Kärkkäinen and Savolainen 1993;  
133 Hedrick et al. 1999). Likewise, polyembryony could explain the absence of

134 a relationship between inbreeding depression and the primary selfing rate  
135 in gymnosperms (Husband and Schemske 1996). However other models of  
136 polyembryony make drastically different predictions — for example, Latta  
137 (1995) modelled the embryo competition component of polyembryony and  
138 found that e.g., under a mild mutations model, polyembryony decreased  
139 the number of deleterious mutations per individual. In this work we un-  
140 cover that much of these differences are attributable to implicit modelling  
141 decisions that consider polyembryony as a mechanism of embryo choice or  
142 reproductive compensation.

143 The previous work described above provide some insight into the evo-  
144 lutionary consequences of polyembryony, but contains numerous modelling  
145 assumptions that limit their applicability to major questions in the evolu-  
146 tion of polyembryony and its consequences. For example, comparing cases  
147 with and without reproductive compensation, Porcher and Lande (2005)  
148 showed that reproductive compensation can favor the evolution of selfing  
149 and can allow for the maintenance of mixed mating systems, while Sakai  
150 (2019) showed that selective embryo abortion could allow for the mainte-  
151 nance of high levels of inbreeding depression in selfing species. But if the  
152 mating system of an initially monoembryonic population affects whether  
153 polyembryony evolves in the first place, this initial condition may affect  
154 subsequent mating system evolution after the transition to polyembryony.  
155 A second limitation with current theory of the evolutionary consequences  
156 of polyembryony is that each model has focused on a single dominance and  
157 selection coefficient. As such, while current theory predicts evolution of  
158 the number and frequency of deleterious mutations, the magnitude of ge-  
159 netic load, it cannot predict evolution of the distributions of dominance or  
160 selection coefficients, the architecture of genetic load. This limitation has

161 prevented theory from addressing Koski’s 1971 hypothesis that the “Embryo  
162 Lethal System” evolved as an altruistic mechanism by which inbred embryos  
163 sacrifice themselves to prevent their mothers from selfing, as opposed to the  
164 parsimonious alternative that selfing simply exposes the elevated number of  
165 deleterious mutations that can accumulate under polyembryony.

166 Here we present a series of infinite-sites forward population genetic sim-  
167 ulations of polyembryony. This model allows us to evaluate the relative  
168 importance of competition and compensation to the evolution of polyem-  
169 bryony, the evolutionary consequences of alternative models of embryo se-  
170 lection, and if polyembryony can favor the evolution of an increased recessive  
171 load as a mechanism to prevent inbreeding.

## 172 **Methods**

### 173 *Overview*

174 We present a series of models to disentangle the contribution of the potential  
175 evolutionary benefits of compensation and competition to the evolution of  
176 polyembryony. To better understand how and when these factors favor  
177 the evolution of polyembryony, we vary the distribution of dominance and  
178 fitness effects and the probability of selfing. Importantly, by changing the  
179 underlying probability of selfing, we can address the possibility that when  
180 polyembryony evolves as a mechanism of embryo competition, that it may in  
181 fact be favored as a mechanism of preventing the generation of self-fertilized  
182 offspring. That is, we may hypothesize that polyembryony can evolve to  
183 minimize the realized selfing rate. When polyembryony does evolve, we ask  
184 how its evolution shapes the genetic load and its architecture.

185 The life cycle begins with  $N = 1000$  diploid seeds, each of which has



186 one or two embryos, depending on whether mothers are mono- or polyem-  
187 bryonic. Following embryo selection, surviving seed parents for the next  
188 generation are chosen with replacement with a probability reflecting their  
189 post-embryonic fitness. Each time a seed parent is chosen, it generates one of  
190 the  $N$  seeds in the next generation, thus maintaining a constant population  
191 size. Each embryo in the seed is fertilized independently. If directly selfed,  
192 which occurs with probability equal to the selfing rate, the seed parent of  
193 an embryo is also its pollen parent, otherwise the pollen parent is selected  
194 at random and in proportion to adult fitness. Next, gametes are formed  
195 by free recombination and each gamete acquires mutations. Finally, fusion  
196 between gametes generates the seeds and embryos for the next generation  
197 (??).

### 198 *Parameters and model details*

199 **Genome structure and mutation rate:** Every generation, each hap-  
200 loid genome expects a Poisson distributed number (mean  $U$ ) of *de novo*  
201 deleterious mutations to arise, each at any one of an infinite number of un-  
202 linked sites (i.e. an infinite sites model). We investigate cases with  $U = 0.5$   
203 mutations per haploid chromosome per generation.

204 **The timing of mutational effects:** We focus on the case in which half  
205 of *de novo* deleterious mutations impact embryonic fitness and the other half  
206 impact post-embryonic fitness. Our code also allows mutations to influence  
207 both pre- and post-embryonic fitness pleiotropically. However our initial  
208 early investigation showed that this pleiotropic effect trivially favored the  
209 evolution of polyembryony, so we do not investigate this pleiotropic model  
210 here.

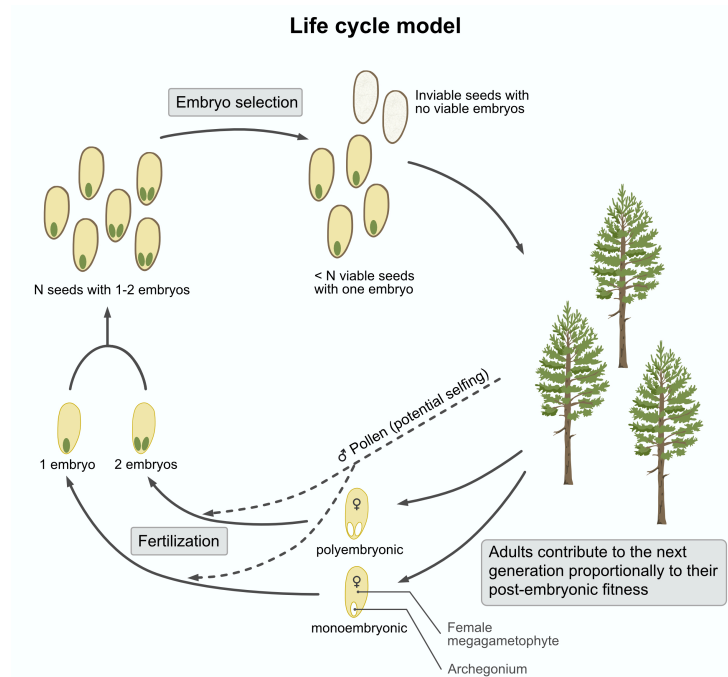

Figure 1: **Overview of the life cycle model:** The life cycle starts with  $N$  seeds, each with one or two embryos, followed by embryo and seed selection. Because of seed inviability, the number of plants will be less than  $n$ . Seed parents are chosen with replacement in proportion to their post-embryonic fitness, and directly self with probability  $p_{\text{self}}$ . Both embryos of polyembryonic mothers are fertilized independently, and pollen parents of non-selfed seed are sampled with from the population with replacement in proportion to each genotypes post-embryonic fitness. Seed parents carrying the dominant polyembryony allele, produce two archegonia per seed, while those without this allele produce only one.

211 **The distribution of fitness and dominance effects of new mutations:**

212 For all parameter values, fitness effects ( $s$ ) across loci are multiplicative  
 213 and independent (Bramlett and Bridgwater 1986, as cited in Williams and  
 214 Savolainen 1996), such that the fitness of the  $i^{\text{th}}$  individual,  $w_i$ , equals the  
 215 product of one minus the deleterious effect of their genotype at the  $k^{\text{th}}$   
 216 locus, taken across all loci (i.e.  $w_i = \prod_k (1 - s_{ik})$ ). To investigate the impact

217 of mutational architecture on the evolution of polyembryony, we compare  
218 models with a different value of fitness ( $s$ ), and dominance ( $h$ ) effects of new  
219 mutations. For  $s$  we present cases with  $s = 0.1$ ,  $s = 0.5$ ,  $s = 1$ , and  $s =$   
220  $\text{Uniform}(20/N, 1)$ . Dominance,  $h$ , can take any value between 0 and 1, but  
221 we present cases with full recessivity ( $h = 0$ ) and full additivity ( $h = 0.5$ ), as  
222 well as a case where the dominance of each mutation takes a random value  
223 between zero and one from the uniform distribution ( $h = \text{Uniform}(0, 1)$ ).  
224 Thus, mutation effects span the range from quite deleterious to lethal, but  
225 will not reach fixation by random genetic drift. Practically, this means that  
226 we save considerable computational resources, and that we do not consider  
227 weakly deleterious mutations whose fixation is not effectively prevented by  
228 selection. In all simulations, we assumed that the distribution of fitness and  
229 dominance effects did not differ for mutations impacting the embryo and  
230 adult.

231 **Selfing:** With a probability equal to the  $p_{\text{self}}$  (which we systematically  
232 varied from zero to one in increments of 0.2) the seed parent was also cho-  
233 sen to be the pollen parent. Otherwise, mating was random, with pollen  
234 parents chosen and with replacement in proportion to adult fitness, using  
235 the `sample()` function in R (R Core Team 2020). We note that this random  
236 mating does not preclude selfing. Therefore, even with  $p_{\text{self}} = 0$ , one of  
237 every  $N_e$  embryos (approximately 0.001 when  $N = 1000$ , depending on seed  
238 survival rates and the variance in post-embryo fitness) is expected to have  
239 identical pollen and seed parents.

240

## *Evolution*

241 **Burn in:** For all parameter combinations, we forward simulated ten repli-  
242 cates process for 2000 generations, ensuring that populations achieved mutation-  
243 selection-drift balance by visually examining the variability in the number  
244 of deleterious mutations over time and among replicates (Figure S1). For  
245 most parameter values, equilibrium was reached within this time frame (Fig-  
246 ure S1). However, for recessive mutations in predominantly outcrossing  
247 populations (with selfing rates of 0, 0.2, or 0.4) this was not enough time  
248 to reach equilibrium. For these slowly equilibrating cases, we increased  
249 the burn-in period until 3000 generations, at which point equilibrium was  
250 largely achieved. Finally, with complete selfing and a non-recessive load  
251 with  $s = 0.1$ , the number of deleterious mutations seems somewhat unsta-  
252 ble (Figure S1).

253 **Invasion of polyembryony:** For each burn in replicate, we ran many  
254 introductions of a dominant acting polyembryony allele, introduced at a  
255 frequency of  $1/2N$ , and kept track of the fate of this allele (loss or fixa-  
256 tion) for each introduction. Due to computational considerations, we varied  
257 the number of introductions from 500 to 1000 for each model of polyem-  
258 bryony (below) for each burn-in replicate. That is, when polyembryony  
259 was strongly favored, a given simulation took longer to complete (because  
260 fixation from  $1/2N$  takes more time than loss from  $1/2N$ ). By contrast,  
261 when polyembryony is not strongly favored, individual simulations are faster  
262 (because loss occurs more quickly than fixation) and more precision was  
263 needed to distinguish fixation rates from neutrality. The R (R Core Team  
264 2020) code for these forward simulations is available on github [https:](https://github.com)

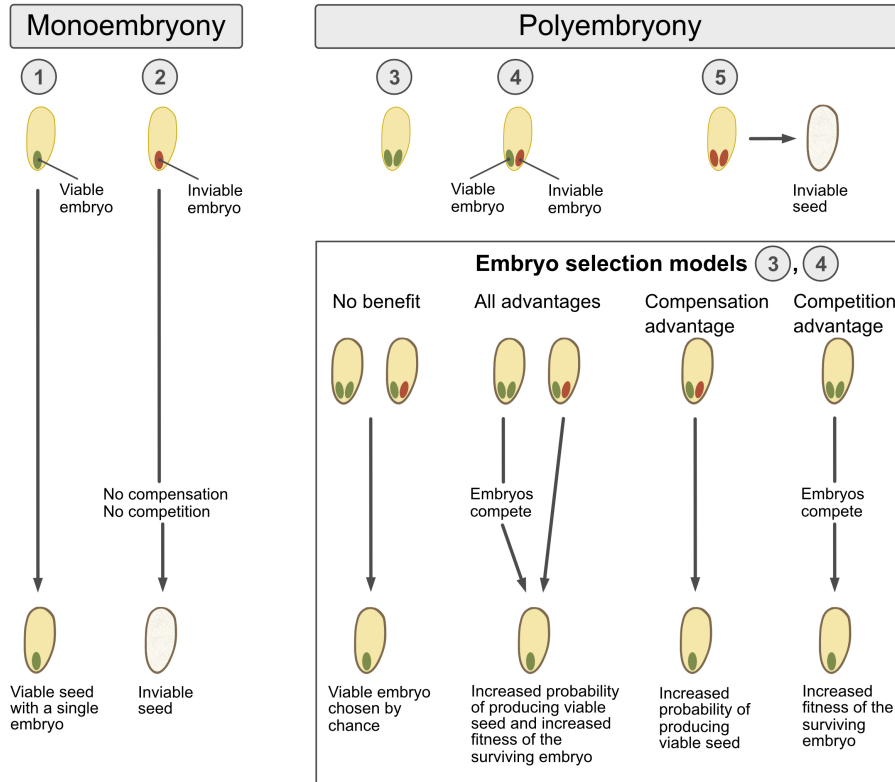

Figure 2: **Monoembryony and polyembryony:** (A) Under monoembryony, the seed viability is defined by the viability of the single embryo. (B) In simple polyembryony with two embryos, the seed has three possible combinations of viable and inviable embryos. In cases with 1-2 viable embryos, the outcome is defined by the four embryo selection models (see text for details)

265 //github.com/ybrandvain/polyembryony.

266

### *Models of polyembryony*

267 We aim to dissect the contribution of reproductive compensation and embryo  
 268 competition to the evolution of polyembryony.

269 The reproductive compensation benefit of polyembryony is that having

270 two potential embryos in a seed increases the probability that a seed will  
271 contain a viable embryo. Thus, the benefit of reproductive compensation  
272 occurs if the survival of at least one embryo ensures a viable seed. We can  
273 effectively remove this benefit of polyembryony by allowing seed viability  
274 to be determined by survival of an arbitrarily chosen embryo among that  
275 seed's two embryos.

276 The embryo competition benefit of polyembryony is that, if there is any  
277 relationship between early embryo viability and adult fitness, mothers can  
278 increase their expected inclusive fitness by allowing embryos to compete and  
279 the more vigorous embryo to become the dominant embryo. We allow for  
280 the benefit of embryo competition by selecting the embryo that makes it to  
281 the seed among surviving embryos with probabilities in proportion to their  
282 embryonic fitness. We can effectively remove this benefit of polyembryony  
283 by randomly choosing a single surviving embryo in a seed to become the  
284 dominant embryo and continue development. Factorially combining these  
285 options results in four models for the evolution of polyembryony (Figure 2).

286 **All advantages:** In this model, each embryo in the seed of a polyem-  
287 bryonic mother survives independently with a probability determined by its  
288 embryonic fitness. If only one embryo survives, this embryo develops into the  
289 seed, and if both embryos survive, the embryo that develops in the seed is  
290 chosen in proportion to the relative embryonic fitness of each embryo (i.e. if  
291 both embryos survive, the probability an embryo develops into a seed equals  
292 its fitness divided by the sum of the fitness of both surviving embryos. Thus,  
293 this model includes both potential benefits of polyembryony.

294 **Compensation only:** In this model, each ovule in the seed of a polyem-  
295 bryonic genotype survives independently with a probability determined by  
296 its embryonic fitness. If only one embryo survives, this embryo develops  
297 into the seed, and if both embryos survive, the embryo that develops in the  
298 seed is chosen at random. As such, polyembryony provides the benefit of  
299 increasing the probability that a seed survives, but does not provide the  
300 added benefit of embryo competition. This model resembles the case of re-  
301 productive compensation (Porcher and Lande 2005), as inviable genotypes  
302 can be replaced. This type of selection is much like hard selection – embryo  
303 viability is not dependent on the fitness of the other embryo, however em-  
304 bryos with inviable siblings are more likely to become seed than are embryos  
305 with viable siblings.

306 **Competition only:** In this model, a seed in a polyembryonic genotype  
307 survives with a probability equal to the embryonic fitness of an arbitrarily  
308 chosen embryo (embryo 1 in our simulation). Thus, if this embryo dies but  
309 the other lives, the seed still dies. As such, monoembryonic and polyembry-  
310 onic genotypes will have the same probability of developing a viable seed  
311 (i.e. in both cases seed survival is determined by the fitness of a single  
312 random embryo). However, if both embryos survive, the embryo that devel-  
313 ops in seed is chosen in proportion to the relative embryonic fitness of each  
314 embryo.

315 **No benefit:** In this model, seed survival is determined based on the fitness  
316 of a random embryo in that seed, as in the embryo competition model, while  
317 embryo selection follows the bet-hedging model, in which each embryo in a  
318 seed has an equal probability of surviving. As such, there should be no

319 advantage of polyembryony. This model acts as a control to ensure that our  
320 simulation scheme meets neutral expectations and that our control for each  
321 potential benefit of polyembryony is properly implemented.

## 322 **Results**

323 .

### 324 *Burn-in simulations*

325 We discuss the results from our burn-in simulations, as they set the scene  
326 for the evolution of polyembryony. Throughout the discussion of burn-in  
327 results, we focus on mutations impacting embryo fitness, as results for post-  
328 embryonic fitness follow similar qualitative and quantitative patterns (Figure  
329 S1). Genomes saved at the end of the burn-in are available for download  
330 here.

331 **Comparison to published analytical results:** Before discussing spe-  
332 cific results, we evaluate whether our simulations behave sensibly by compar-  
333 ing model output to known analytical results – namely, the expected number  
334 of recessive lethal mutations per diploid genome in a panmictic population.  
335 Based on classic results of Li and Nei (1972), Gao et al. (2015) show that  
336 the expected number of recessive lethals per (diploid) individual in a finite,  
337 panmictic population equals  $U\sqrt{2\pi N_e}$ , where  $U$  is the mutation rate per  
338 haploid genome, and  $N_e$  is the effective population size. For the case of re-  
339 cessive embryo lethals in outcrossers, we find a mean of 18.6 mutations per  
340 diploid genome, a value remarkably consistent with the predicted value of  
341 18.4 (Compare dashed white line to simulation results in Figure 3A). That



342 is, if  $U = 0.25$ , as we are only concerned with mutations impacting em-  
343 bryo fitness (half of total mutations), and  $2N_e \approx 1745$ , the mean number of  
344 surviving embryos across replicates in the final generation. Additional ex-  
345 ploratory simulations (not shown) found a consistent agreement with theory  
346 across a range of mutation rates.

347 **Novel Burn-in Results:** Recessive lethal mutations are effectively purged  
348 with predominant selfing (selfing rate  $> 0.5$ ), while a large number of dele-  
349 terious mutations accumulate with predominant outcrossing (Figure 3A).  
350 Intriguingly, with an intermediate selfing rate of 0.4, the population appears  
351 to reach an equilibrium, relatively modest number of recessive mutations,  
352 until this rapidly and dramatically increases, presumably reflecting a tran-  
353 sition from effective purging to interference among deleterious mutations  
354 (Lande et al. 1994; Porcher and Lande 2016). Across all parameter com-  
355 binations, the number of deleterious mutations at equilibrium decreased as  
356 mutations became more deleterious and more additive (Figure S1A). Ad-  
357 ditionally, across all dominance and selection coefficients, the number of  
358 deleterious alleles in a population decreased with the selfing rate. However,  
359 the results for obligate selfers were somewhat unstable with weak selection  
360 and non-recessive dominance coefficients.

361 When mutations are recessive ( $h = 0$ ), mean fitness is lowest with in-  
362 termediate selfing rates, and is generally highest with high levels of selfing  
363 or outcrossing (Figure 3B). This pattern is most pronounced when reces-  
364 sive mutations are lethal ( $s = 1$ ), exceptionally deleterious ( $s = 0.5$ ), or  
365 where selection coefficients were drawn from a uniform distribution, and  
366 more subtle with a selection coefficient of  $s = 0.1$  (Figure 3B). By contrast,  
367 when mutational effects are additive ( $h = 0.5$ ) or are drawn from a uniform

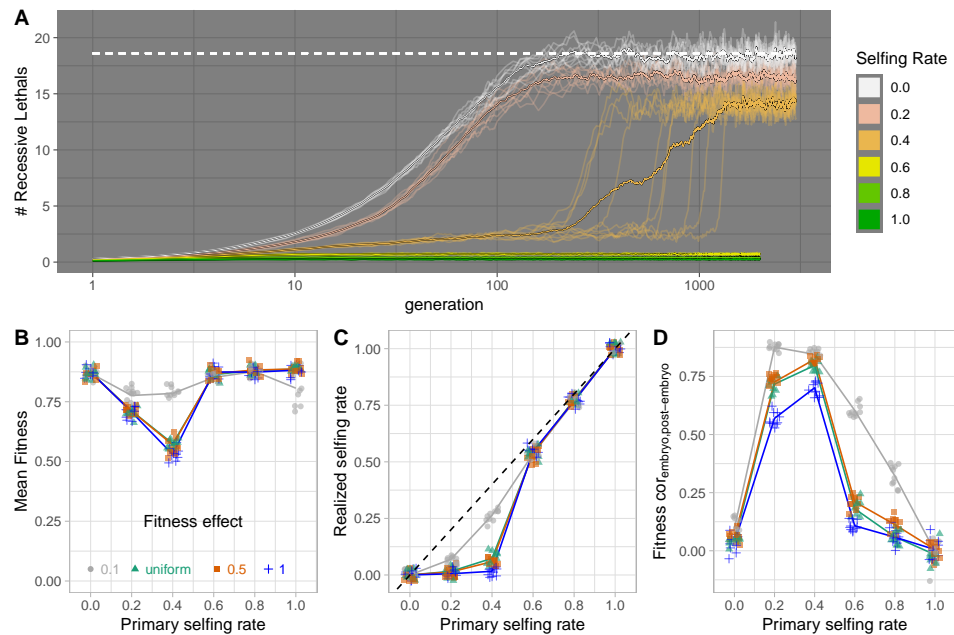

Figure 3: **Results from burn-in:** (A) The mean number of recessive lethal alleles per haploid genome over time. Each line is one of ten replicates for each selfing rate, designated by color. The dashed white line shows the theoretical expectation for a randomly mating population in our simulation, while the larger colored line shows the mean across replicates. Results with different dominance and selection coefficients are presented in Figure S1. Figures (B-D) show features of the population 'burn-in' populations after the load equilibrates. Points are slightly jittered to show the data - with one value for each replicate simulation for a given combination of selfing rates on the x, and fitness effects of new mutations in color, lines connect means. In C, the one to one line is shown by the dashed black line. All mutations are fully recessive. Results with different dominance coefficients are presented in Figure S2.

368 distribution, mean fitness increases with the selfing rate, with significantly  
 369 positive slopes ranging between 0.045, and 0.082 (Figure S2A, Table S1),  
 370 presumably because selfing increases the variance in fitness, allowing for  
 371 more effective selection. In these non-recessive cases, mean embryo fitness is  
 372 roughly similar, regardless of the fitness effects of individual mutations (Fig-

373 ure S2, modelling mean fitness =  $f(\text{selfing}, s)$ , the p-value for the effect of  
374  $s$  is 0.059 and 0.25, for cases with a uniform and additive load, respectively,  
375 Table S2). Reassuringly, this grand mean fitness under obligate outcrossing  
376 for non-recessive alleles of 0.78 is in line with Haldane's 1937 classic result  
377 that mean fitness equals  $e^{-U}$  (where  $U$  is the mutation rate per haploid  
378 genome, which equals 0.5 divided by two, as half of mutations will impact  
379 embryo fitness). Somewhat surprisingly, mean post-embryonic fitness does  
380 depend on the selection coefficient (Fig. S2D), suggesting that selection at  
381 one life stage impacts outcomes at another as suggested by (Sakai 2019).

382 With intermediate selfing rates and recessive gene action, we observe a  
383 much higher primary than realized selfing rate, suggesting that inbreeding  
384 depression underlies much of the embryo death in these cases (Fig. 3C).  
385 By contrast, we observe a nearly perfect relationship between primary and  
386 realized selfing rates under non-recessivity (Fig. 3B). We observe a strong  
387 positive correlation between embryo and post-embryo fitness for recessive  
388 gene action and intermediate selfing rates, but no relationship otherwise  
389 (Fig. 3D, and Fig. S2D). Together these results support the intuition that  
390 if competition acts to remove selfed embryos, this benefit of polyembryony  
391 will be most relevant when mutations are recessive.

### 392 *Invasion of polyembryony*

393 We compare the fixation probability of a new mutant that confers polyem-  
394 bryony, across all models described above. We find that, when the polyem-  
395 bryony allele fixes, it tends to fix more quickly when polyembryony provides  
396 reproductive compensation than when it does not (Fig. 4A, Fig. S4, Table  
397 S3). Similarly, polyembryony is most likely to fix when it provides repro-

398 ductive compensation – in some cases, single mutations have up to a fifteen  
399 percent chance of reaching fixation, a 300-fold increase in the probability,  
400 relative to neutral expectations (Fig. 4B & 4C). The benefits of competition  
401 alone also favored the evolution of polyembryony, but had a more modest  
402 effect – in some cases, single mutations have up to a one percent chance of  
403 reaching fixation, a 20-fold increase in the probability, relative to neutral  
404 expectations. Reassuringly, fixation proportions from the no benefits model  
405 matched neutral expectations, with approximately  $1/2N = 0.0005$  introduc-  
406 tions resulting in fixation (See Table S3, and compare the solid lines to the  
407 dashed line in Figure 4B).

408 Other biological parameters such as the selfing rate, and the dominance  
409 and selective coefficients of deleterious mutations also impact on the evolu-  
410 tion of polyembryony, often depending on their interaction. Below we discuss  
411 the effects of selfing rate and additive vs. recessive modes of gene action,  
412 noting that results from the uniform mode of gene action are qualitatively  
413 similar to the additive model (Fig. S3, Table S3).

414 **The benefit of reproductive compensation** strongly favored the evo-  
415 lution of polyembryony for all biological parameters investigated (Fig. 4).  
416 Figure 4C displays the fixation proportions for the compensation models  
417 (row two in Fig. 4B) on a linear scale to reveal the effect of selfing rate and  
418 selective effects of new mutations.

419 Under recessivity, the probability of fixation is maximized (approxi-  
420 mately 15%) at intermediate selfing rates, suggesting that polyembryony  
421 can evolve to make up for offspring lost to early acting-inbreeding depres-  
422 sion. Again assuming recessivity, obligate outcrossing more strongly favors  
423 the evolution of polyembryony than does obligate selfing (compare an ap-

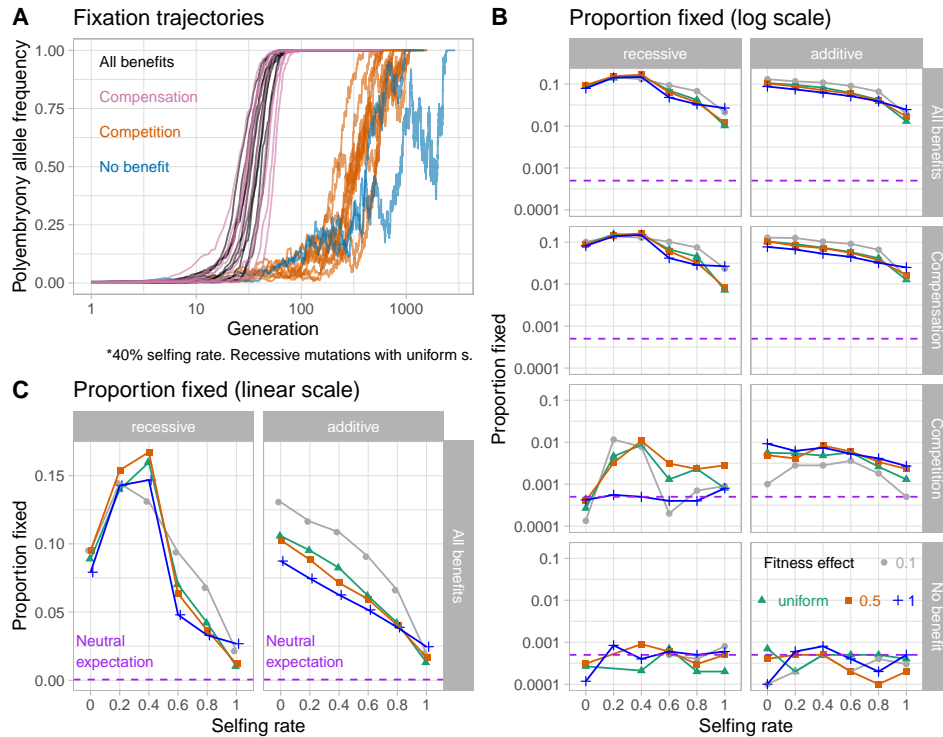

**Figure 4: The fixation of an allele conferring polyembryony: A)** Example trajectories of the fixation of the polyembryony allele with all benefits (black), the benefit of compensation (pink), the benefit of competition (orange), and no benefit (blue). Note that generation on x increases on the log<sub>10</sub> scale, but specific values are noted with their linear value. **B)** The proportion of introductions resulting in fixation of the polyembryony allele as a function of the selfing rate (x), the fitness effect of new mutations (color), the mode of gene action (columns), and the benefit of polyembryony (rows). The dashed pink line displays the expectation under neutrality. Note that fixation proportion on y increases on the log<sub>10</sub> scale, but specific values are noted with their linear value. **C)** The proportion of introductions resulting in fixation of the polyembryony allele as a function of the selfing rate (x), the fitness effect of new mutations (color), the mode of gene action (columns), with all the benefits of polyembryony. The values are identical to those in the first row of **B**, but are presented on a linear scale to highlight the effect of selfing rate on fixation probability.

424 proximately 10% fixation probability under obligate outcrossing to a 2.5%  
425 fixation probability under obligate selfing, Fig. 4C), presumably reflecting  
426 the higher within-seed variance in fitness under obligate outcrossing leading  
427 to higher impact of polyembryony. The fitness effect of recessive deleterious  
428 mutations have only a modest effect on fixation proportion, varying slightly  
429 across selfing rate.

430 However, the compensation model also strongly favors the evolution of  
431 polyembryony with an additive load, suggesting that overcoming inbreeding  
432 depression is not the only driver of the evolution of polyembryony. (Second  
433 row, second column, Figure 4B). In cases with additive gene action, the  
434 fixation probability of a polyembryony allele decreases with the selfing rate,  
435 again reflecting the lack of within-seed variance in fitness. Additionally,  
436 under additivity (or if mutations take their dominance coefficients from a  
437 uniform distribution, Table S3, Figure S3) a load composed of highly deleterious  
438 mutations is less likely to foster the evolution of polyembryony than a  
439 load composed of a larger number of mild mutations (compare  $s = 1$  (blue)  
440 to  $s = 0.5$  (orange) or  $s = \text{uniform}$  (teal) to  $s = 0.1$  (grey), Fig. 4). This surprising  
441 result might reflect the fact that while mean fitness does not depend  
442 on fitness effects of new mutations, the survival of maternal sib-embryos  
443 becomes more dependent on one another as mutational effects get larger  
444 (Figure S5). As such, with large effect mutations, a backup embryo is less  
445 useful as if one dies the other is likely to die as well.

446 **The benefit of embryo competition** also favors the evolution of polyem-  
447 bryony. However, fixation probabilities are approximately five- to ten-fold  
448 lower for this model than for the reproductive compensation model. With  
449 a recessive load and intermediate selfing rates (0.20 or 0.40), the benefit

450 of embryo choice results in the fixation of the polyembryony allele in ap-  
451 proximately one percent of introductions, a twenty-fold increase relative to  
452 the neutral expectation of 0.05%. Somewhat surprisingly, the embryo com-  
453 petition model favors polyembryony for a non-recessive load (Third row,  
454 second column of Fig. 4B), even though embryo fitness was uncorrelated  
455 with post-embryo fitness in these models (Fig. S2). This likely reflects the  
456 benefit of producing grand-children with higher embryonic fitness who will  
457 out-compete their siblings (analogous to models of “runaway sexual selec-  
458 tion” Kirkpatrick 1982). Under both additivity and a uniform distribution  
459 of mutational effects, the probability of fixation of an allele conferring com-  
460 petitive polyembryony is greatest in predominantly outcrossing populations  
461 (selfing rates of 0.40 or less), decreasing as the selfing rate increases. Here,  
462 the probability of fixation is greatest when the load is composed of alleles  
463 of large effect, a result that runs counter to that found in the compensation  
464 model with an additive load.

465 **All benefits** results in fixation probabilities qualitatively similar to the  
466 reproductive compensation model (Fig. S3, Table S3) – reflecting the im-  
467 portance of the benefits of reproductive compensation, to the evolution of  
468 polyembryony.

469 **No benefits** results in fixation probabilities consistent with neutral ex-  
470 pectations (Fig. S3, Table S3).

### 471 *Evolutionary consequences of polyembryony*

472 We compare how different models of the evolution of polyembryony shape  
473 key features of a population, including the proportion of surviving seeds,

474 the realized selfing rate and the architecture of genetic load. Although a  
475 strict version of the competition only model is unlikely to occur in nature,  
476 its inclusion allows us to distinguish the individual effects of competition  
477 and compensation when both would be operating in nature (i.e. the all ben-  
478 efits model). Because results were qualitatively similar across all selection  
479 coefficients (save the decrease in fitness with recessive mutations,  $s = 0.1$   
480 and high selfing rates, which did not always converge Fig. S1), and because  
481 results from the additive model and the uniformly distributed dominance  
482 coefficient model did not differ qualitatively, we focus on results from the  
483 cases in which the selection coefficients of new mutations are selected at  
484 random from a uniform distribution, exploring cases in which mutations are  
485 recessive or additive (Figure 5).

486 Curiously, the benefit of embryo competition alone did not impact the  
487 realized selfing rate (Fig. 5), even with recessive mutations and intermedi-  
488 ate selfing rates. This result is a consequence of features of both our model  
489 and biological reality. Specifically, there are limited opportunities for com-  
490 petition between selfed and outcrossed embryos in a seed (Williams 2007),  
491 as this only occurs with a probability equal to two times the variance in  
492 the selfing rate (the probability that exactly one of two embryos is from a  
493 self-fertilization event) times the probability that both are destined to sur-  
494 vive. By contrast, with a recessive load a benefit of compensation decreases  
495 the realized selfing rate, and increases the number of mutations impacting  
496 embryo fitness in partially selfing populations (Fig. 5).

497 The benefit of compensation (in both the compensation and all benefits  
498 model) resulted in a strong increase in seed survival. Under a recessive load,  
499 this effect was maximized with intermediate selfing rates, while it decreased  
500 steadily with selfing rate under a (partially) additive load. By selecting for



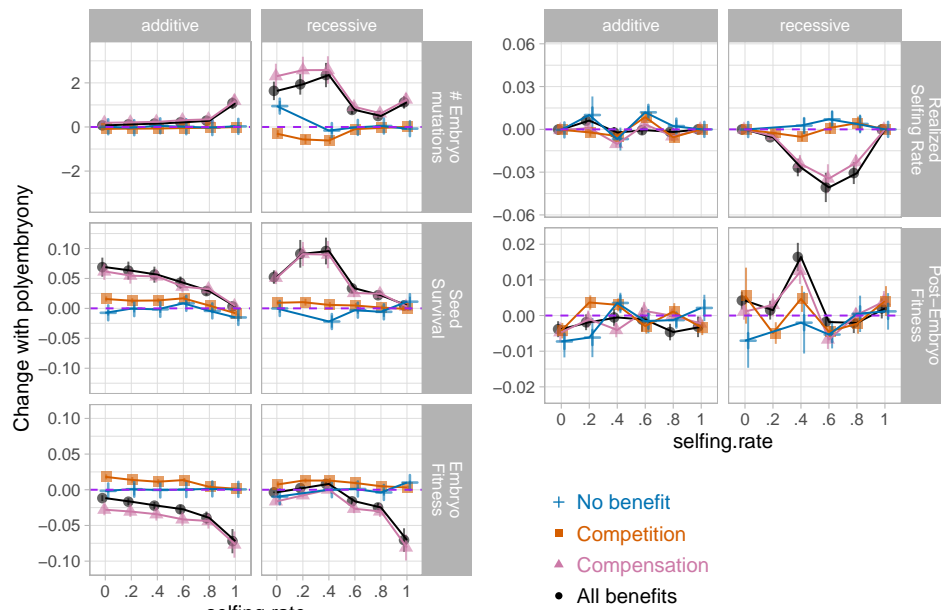

Figure 5: **The evolutionary impact of polyembryony.** How the evolution of polyembryony impacts the per individual number of mutations impacting embryo fitness, expected seed survival, mean embryo fitness, the realized selfing rate, and mean post-embryo fitness (rows), when mutations are additive or recessive (columns), across selfing rates (x-axis), for each model of polyembryony (color).

501 higher fitness embryos, the benefit of competition alone subtly increased  
 502 seed survival for all models of dominance investigated so long as the selfing  
 503 rate was not too large (Fig. 5). Consequently, the expected embryo fitness of  
 504 the surviving seeds subtly increases with the benefit of embryo competition,  
 505 but decreases with compensation. These benefits appear to act additively,  
 506 such that the expected embryo fitness decreases in the all benefits model  
 507 but does so less severely than in the compensation model.

508 Regardless of the mode of gene action, the competition model does not  
 509 increase the expected post-embryo fitness of surviving seeds (Fig. 5). While

510 post-embryo fitness modestly increases with the evolution of polyembryony  
511 under a model of competition with intermediate selfing rates and a recessive  
512 load, this increase pales in comparison to the benefits of higher seed viability  
513 which accompanies reproductive compensation. Together, these lines of evi-  
514 dence suggest that polyembryony does not evolve as a mechanism to prevent  
515 self-fertilization, and is not analogous to the system of self-incompatibility  
516 observed in angiosperms.

517 Additional evidence against the hypothesis that the embryonic lethal  
518 system evolves as an SI-like mechanism comes from the allele frequency  
519 spectrum of deleterious mutations (Fig. 5). If the prevention of the forma-  
520 tion of inviable selfed seeds by eliminating selfed embryos favored a system  
521 to destroy selfed embryos, we would expect an increase in very rare reces-  
522 sive lethal alleles so as to ensure the death of selfed embryos. Contrary to  
523 this expectation, we see no such shift in the frequency spectrum. Figure 6  
524 shows that the allele frequency spectrum is comparable in the no benefit and  
525 competition model, arguing against the idea that competition favored self-  
526 sacrifice in the form of an excess of rare recessive lethals. By contrast, there  
527 is a slight increase in the count of deleterious recessive mutations across all  
528 frequency classes in the compensation and all benefits models, reflecting the  
529 relaxation of embryo selection in these cases.

## 530 Discussion

531 We present four models to test the plausibility of the compensation and  
532 competition theories for the evolution of polyembryony. We find that the  
533 evolutionary benefit of compensation – that is, the opportunity for a backup  
534 embryo to replace an inviable one – strongly favors the evolution of polyem-

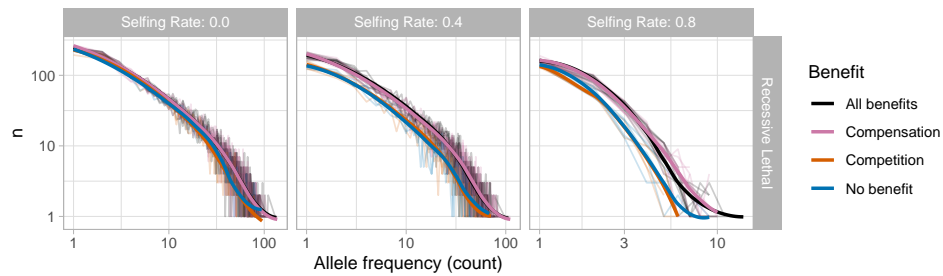

Figure 6: **The allele frequency spectrum** for embryo acting allele following the evolution of polyembryony under the recessive lethal model for a selfing rate of 0.00, 0.40, and 0.80 (left to right). Lines display averages of ten simulation replicates, and colors note the model of polyembryony. Note that the x axis with a selfing rate of 0.80 (right panel) is truncated relative to the other selfing rates, reflecting the effective purging of early acting recessive mutations with high selfing rates.

535 bryony. Relative to neutral expectations, the benefit of compensation results  
536 in between a twenty-fold increase in fixation probability above the neutral  
537 expectation with high selfing rates, and a two hundred-fold increase with in-  
538 termediate to low selfing rates and a recessive load, all across a broad range  
539 of selection and dominance coefficients. By contrast, the benefit of embryo  
540 competition more weakly favored the evolution of polyembryony, resulting  
541 in between a zero-fold increase with high selfing rates, and a twenty-fold  
542 increase, with intermediate to low selfing rates and a recessive load, relative  
543 to neutral expectations.

544 Our work highlights the previously underappreciated result that the con-  
545 sequences of polyembryony depend on its function. When polyembryony  
546 functions as a compensation mechanism, mean embryo fitness is reduced,  
547 but the probability of seed survival increases, consistent with previous work  
548 (Latta 1995; Porcher and Lande 2005). By contrast, competition between  
549 embryos alone increases embryo fitness, but has a negligible effect on seed

550 survival, in line with models of competition alone (Latta 1995). With a re-  
551 cessive load, the benefit of compensation acts to decrease the effective selfing  
552 rate, while competition did not. With both the benefits of competition and  
553 compensation the evolutionary consequences of polyembryony is somewhere  
554 in between but is often closer to those expected from compensation.

555 **The limited role of embryo competition in the evolution of polyem-**  
556 **bryony:** It has long been assumed that a major benefit of polyembryony  
557 is that it provides an opportunity for embryos to compete (Sarvas 1962;  
558 Koski 1971), and to create high fitness offspring offspring. Not only was  
559 the benefit of competition a comparatively weak force in the evolution of  
560 polyembryony, but it did not reliably increase seed fitness. In fact, under  
561 most selfing rates and dominance coefficients, competition more strongly fa-  
562 vored the evolution of polyembryony with an additive load (in which there  
563 is no relationship between embryo and post embryo fitness) than a recessive  
564 load (in which there was such a relationship). This is surprising because  
565 there is a limited scope for selection on polyembryony when it cannot affect  
566 post-embryo fitness. In this case, selection on polyembryony only occurs  
567 within polyembryonic seeds themselves, and, since the embryos' maternal  
568 genomes are identical, only among the paternal genomes. Like runaway sex-  
569 ual selection (Fisher 1915), the automatic transmission advantage of selfing  
570 (Fisher 1941), or meiotic drive (Rhoades 1942), embryo competition is an  
571 example of a selective advantage that does not make a population necessarily  
572 more adapted to its environment.

573 **Why doesn't embryo competition effectively remove selfed off-**  
574 **spring and increase post-embryonic fitness (and could it ever)?**

575 We considered only two embryos and only allowed for competition if both  
576 embryos were destined to live in our model of embryo competition. As such,  
577 embryo competition can only weed out selfed offspring when one seed is  
578 selfed and the other is not and both seeds are destined to live. Because  
579 predominant selfing (selfing rate  $> 0.5$ ) purges the recessive load, and pre-  
580 dominant outcrossing (selfing rate  $< 0.5$ ) generates large inbreeding depres-  
581 sion, in most cases in which selfed and outcrossed embryos could compete,  
582 their fitness is either nearly equal or the selfed embryo is destined to die.  
583 As such, embryo competition does not offer a more refined view into post-  
584 embryo fitness than is automatically accounted for by “hard selection” on  
585 seed viability imposed in our model. Our observation that embryo compe-  
586 tition leads to more competitive embryos rather than higher fitness plants  
587 is consistent with the claim of McCoy and Haig (2020) that Goodhart’s law  
588 – ‘When a measure becomes a target it ceases to be a good measure’ – can  
589 undermine effective embryo selection. Despite our focus on the evolution  
590 of polyembryony, these results apply broadly and suggest that verbal mod-  
591 els predicting that selective embryo abortion could limit the mating costs  
592 of selfing in plants with mixed mating systems (e.g. Huang et al. 2020),  
593 require more rigorous scrutiny.

594 Nonetheless, it is possible that pure “soft selection” (Wallace 1968, 1975)  
595 on embryos could reliably increase post-embryo fitness. However we had  
596 trouble implementing this model computationally (e.g. we could not define  
597 the allele frequency spectrum of alleles determining success in soft selection  
598 before embryo competition evolved), nor could we map this onto a plausible  
599 biological mechanism. Nonetheless, this challenge could reflect a shortcom-  
600 ing in our imagination, rather than a biological impossibility. Additionally,  
601 we note that even if the benefits of compensation initially favored the evo-

602 lution of polyembryony, it is possible that the evolution of polyembryony  
603 was followed by novel recessive mutations experiencing soft selection and  
604 that therefore the benefits of competition could maintain but not drive the  
605 evolution of polyembryony.

606 **The embryo lethal system:** Since Buchholz (1922), it has been argued  
607 that the embryo-lethal system, an apparently coordinated process of embryo  
608 death, could achieve a similar function to angiosperm self-incompatibility in  
609 the self-compatible gymnosperms. That is, intentional, coordinated death in  
610 the embryo stage would give way to highly outbred surviving adults (Sarvas  
611 1962; Koski 1971). This would be an altruistic act in which an embryo  
612 sacrifices its predictably low fitness for a half sibling. We did not observe  
613 the evolution of an embryo lethal system in response to the evolution of  
614 polyembryony, as would be expected if polyembryony favored altruistic self-  
615 destruction of more inbred embryos (e.g. we did not see a change in the allele  
616 frequency spectrum towards an excess of low-frequency recessive mutations).  
617 However, by relaxing selection on embryo viability, embryo compensation  
618 could indirectly result in an increase in the number of highly deleterious  
619 recessive mutations impacting embryo fitness. As such, while we cannot  
620 exclude possibilities which we did not model (e.g. pure soft selection, above,  
621 or pleiotropy across life stages (below)), it appears that the embryo lethal  
622 system could reflect an elevated load tolerance rather than an exquisite  
623 adaptation (Gould and Lewontin 1979), as Williams (2007) argued forcefully  
624 based on developmental and genetic evidence.

625 **Which has driven the evolution of polyembryony – Compensation**  
626 **or competition?** We find that the benefit of embryo compensation favors

627 the evolution of polyembryony more strongly than does embryo competi-  
628 tion. However, we caution that whether compensation or competition have  
629 actually favored the evolution of polyembryony depends on their biological  
630 plausibility and whether they reflect effective solutions to the problems they  
631 address. That is, we must consider biological processes outside of our model  
632 as we interpret our model results. For example, embryo competition could  
633 perhaps be most effectively achieved by placing more embryos in a seed,  
634 while compensation could be more effectively achieved by producing more  
635 seeds per plant.

636 Our models provide competing testable predictions to distinguish be-  
637 tween predictions of the compensation and competition model at within  
638 seed level, for simple polyembryony, assuming no pleiotropic effects. For  
639 example, we show that the evolution of polyembryony and its consequences  
640 depend on the selfing-rate and dominance coefficient. Specifically, with a re-  
641 cessive genetic load, embryo competition most strongly favors the evolution  
642 of polyembryony at intermediate selfing rates (Fig. 4B,C). The estimates of  
643 selfing rates for modern conifers can reach 0.30 - 0.60 (Sarvas 1962; Sorensen  
644 1982), a range that favors polyembryony. We note, of course, that estimates  
645 of the primary selfing rate from extant conifers rate may differ substantially  
646 from the primary selfing rates of the population in which polyembryony  
647 arose.

648 Additionally, the two models make subtly different predictions about the  
649 difference between the realized and primary selfing rate. Relative to a mo-  
650 noembryonic ancestral population, polyembryony favored by embryo compe-  
651 tition alone does not result in decrease in the difference between realized and  
652 primary selfing rates. By contrast, with a recessive load and intermediate  
653 selfing rates, polyembryony favored by compensation strongly amplified the

654 difference between the realized and primary selfing rates. In nature, differ-  
655 ences between primary and realized selfing rates are often observed in species  
656 with simple polyembryony (Lindgren 1975; Sorensen 1982; Kärkkäinen and  
657 Savolainen 1993; Lande et al. 1994), further emphasizing the probable role  
658 of compensation in the evolution and maintenance of polyembryony.

659 **Alternative Models for the Evolution of Polyembryony:** We as-  
660 sumed no pleiotropy across life stages – that is, mutations either impacted  
661 embryo or post embryo fitness. However, this is clearly untrue. For ex-  
662 ample, severe loss of function mutations in key genes would likely decrease  
663 both embryo and seed fitness. Preliminary investigations of this scenario  
664 (not shown) showed that this model so strongly favored the evolution of  
665 polyembryony that it was theoretically trivial, and we therefore did not  
666 pursue this possibility in greater detail. Theoretical triviality does not im-  
667 ply biological irrelevance, and as such we cannot exclude this biologically  
668 plausible model.

669 On the other hand, an allele could antagonistically increase embryo fit-  
670 ness while decreasing post embryonic fitness. When such a mutation occurs  
671 with embryo competition, it could generate an ontogenic conflict. Empirical  
672 studies, e.g. mapping and measuring of inbreeding depression at different life  
673 stages (Koelewijn 1998), comparing gene expression across embryo develop-  
674 ment and later life stages (Raheison et al. 2012), and signatures of negative  
675 and positive selection in such genes would be valuable to further evaluate  
676 the potential importance of pleiotropy in the evolution of polyembryony.

677 **Competition, compensation and conflict in a pine nutshell:** Gym-  
678 nosperm seed with a maternal haploid megagametophyte, multiple geneti-



679 cally distinct embryos, genetically identical (cleavage) embryos, and strong  
680 inbreeding depression is a stage of evolutionary drama that deserves more  
681 attention, and we hope that the provided model will be used to broaden the  
682 investigations on the evolutionary dynamics outside the angiosperm sphere.  
683 For example, in contrast to the opportunity for altruism to favor the embryo-  
684 lethal system, polyembryony also provides avenues for parental and embry-  
685 onic conflict.

686 In simple polyembryony, embryos are potentially derived from different  
687 sires. A paternal genome carrying a mutation that sabotaged rival embryos  
688 carrying different paternal genomes could possess a net advantage even if  
689 doing so would reduce the probability that a viable seed is formed at all.  
690 Sabotage and anti-sabotage alleles would only be beneficial when expressed  
691 in a particular parental genome, so genomic imprinting that prevented ex-  
692 pression in the wrong parental genome would also be advantageous.

693 Conifers and other gymnosperms provide unique opportunities to test  
694 key questions of plant mating system evolution and evolutionary conflict  
695 from a novel angle, especially now that their genomic resources are no longer  
696 seriously hindered by their large genome sizes. From the practical/empirical  
697 perspective, large seed size and gametophytic tissue allow easy identification  
698 of maternal haplotypes and alleles. Thus expression patterns and genetic di-  
699 versity for example in potentially imprinted genes should be easy to quantify  
700 and identify in many conifer species.

701

## Acknowledgments

702 TP received funding from Academy of Finland (grant nrs. 287431 and  
703 319313) and acknowledges CSC, IT Center For Science for computational  
704 resources. AH was funded through the University of Minnesota Doctoral  
705 Dissertation Fellowship. The authors thank Outi Savolainen for insightful  
706 comments on the manuscript.

707

## Literature Cited

- 708 Agapito-Tenfen, S. Z., N. Steiner, M. P. Guerra, and R. O. Nodari. 2012.  
709 Patterns of polyembryony and frequency of surviving multiple embryos of  
710 the brazilian pine *Araucaria angustifolia*. *Australian Journal of Botany*  
711 59:749–755.
- 712 Bramlett, D. L., and F. E. Bridgwater. 1986. Segregation of recessive em-  
713 bryonic lethal alleles in a F1 population of virginia pine. *In* IUFRO  
714 Conference on Breeding Theory, Williamburg Va.
- 715 Buchholz, J. T. 1922. Developmental selection in vascular plants. *Botanical*  
716 *Gazette* 73:249–286.
- 717 Chamberlain, C. J. 1966. *Gymnosperms: Structure and Evolution; With*  
718 *397 Fig.* Dover Publ.
- 719 Dillard, A. 1974. *Pilgrim at Tinker Creek. Literature* (Harper & Row).  
720 HarperPerennial.
- 721 Dogra, P. D. 1967. Seed sterility and disturbances in embryogeny in conifers  
722 with particular reference to seed testing and tree breeding in pinaceae.  
723 *Studia forestalia Suecica* pages 1–97.
- 724 Fisher, R. A. 1915. The evolution of sexual preference. *Eugenics Review*

- 725 7:184–192.
- 726 ———. 1941. Average excess and average effect of a gene substitution.  
727 *Annals of Eugenics* 11:53–63.
- 728 Forbes, L. S., and D. W. Mock. 1998. Parental optimism and progeny choice:  
729 When is screening for offspring quality affordable. *Journal of Theoretical*  
730 *Biology* 192:3–14.
- 731 Forbes, S. 2009. Portfolio theory and how parent birds manage investment  
732 risk. *Oikos* 118:1561–1569.
- 733 Ganeshiah, K. N., R. Uma Shaanker, and N. V. Joshi. 1991. Evolution  
734 of polyembryony: Consequences to the fitness of mother and offspring.  
735 *Journal of Genetics* 70:103–127.
- 736 Gao, Z., D. Waggoner, M. Stephens, C. Ober, and M. Przeworski. 2015. An  
737 estimate of the average number of recessive lethal mutations carried by  
738 humans. *Genetics* 199:1243–1254.
- 739 Gould, S. J., and R. C. Lewontin. 1979. The spandrels of san marco and  
740 the panglossian paradigm: a critique of the adaptationist programme.  
741 *Proceedings of the Royal Society B: Biological Sciences* 205:581–598.
- 742 Haig, D. 1992. Brood reduction in gymnosperms. Pages 63–84 *in* M. Elgar  
743 and B. Crespi, eds. *Cannibalism: ecology and evolution among diverse*  
744 *taxa*. Oxford University Press, Oxford.
- 745 Haldane, J. B. S. 1937. The effect of variation on fitness. *American Natu-*  
746 *ralist* 71:337–349.
- 747 Hedrick, P. W., O. Savolainen, and K. Karkkainen. 1999. Factors influencing  
748 the extent of inbreeding depression: an example from scots pine. *Heredity*  
749 82 Pt 4:441–450.
- 750 Huang, Q., W. Wang, S. C. H. Barrett, and M. Ren. 2020. Plasticity in se-

- 751 lective embryo abortion may limit the mating costs of geitonogamy in self-  
752 compatible plants: a hypothesis. *American Journal of Botany* 107:390–  
753 393.
- 754 Husband, B. C., and D. W. Schemske. 1996. Evolution of the magnitude  
755 and timing of inbreeding depression in plants. *Evolution* 50:54–70.
- 756 Kärkkäinen, K., V. Koski, and O. Savolainen. 1996. Geographical variation  
757 in the inbreeding depression of scots pine. *Evolution* 50:111–119.
- 758 Kärkkäinen, K., and O. Savolainen. 1993. The degree of early inbreeding  
759 depression determines the selfing rate at the seed stage: model and results  
760 from *Pinus sylvestris* (scots pine). *Heredity* 71:160–166.
- 761 Kirkpatrick, M. 1982. Sexual selection and the evolution of female choice.  
762 *Evolution* 36:1–12.
- 763 Klekowski, E. J. 1982. Genetic load and soft selection in ferns. *Heredity*  
764 49:191–197.
- 765 Koelewijn, H. P. 1998. Effects of different levels of inbreeding on progeny  
766 fitness in *Plantago coronopus*. *Evolution* 52:692–702.
- 767 Koski, V. 1971. Embryonic lethals of *Picea abies* and *Pinus sylvestris*.  
768 Metsäntutkimuslaitos.
- 769 Lakshmanan, K. K., and K. B. Ambegaokar. 1984. Polyembryony. Pages  
770 445–474 in B. M. Johri, ed. *Embryology of Angiosperms*. Springer Berlin  
771 Heidelberg, Berlin, Heidelberg.
- 772 Lande, R., D. W. Schemske, and S. T. Schultz. 1994. High inbreeding de-  
773 pression, selective interference among loci, and the threshold selfing rate  
774 for purging recessive lethal mutations. *Evolution* 48:965–978.
- 775 Latta, R. G. 1995. The effects of embryo competition with mixed mating  
776 on the genetic load in plants. *Heredity* 75:637–643.

- 777 Li, W. H., and M. Nei. 1972. Total number of individuals affected by a single  
778 deleterious mutation in a finite population. *American Journal of Human*  
779 *Genetics* 24:667–679.
- 780 Lindgren, D. 1975. The relationship between self-fertilization, empty seeds  
781 and seeds originating from selfing as a consequence of polyembryony. *Stu-*  
782 *dia Forestalia Suecica* 126:1–24.
- 783 Lynch, M., and B. Walsh. 1998. *Genetics and analysis of quantitative traits*:  
784 Sinauer. Sunderland.
- 785 McCoy, D. E., and D. Haig. 2020. Embryo selection and mate choice: Can  
786 'honest signals' be trusted? *Trends in Ecology and Evolution* 35:308–318.
- 787 Mikkola, L. 1969. Observations on interspecific sterility in picea. *Annales*  
788 *Botanici Fennici* 6:285–339.
- 789 Mock, D. W. 1984. Siblicidal aggression and resource monopolization in  
790 birds. *Science* 225:731–733.
- 791 O'Connell, L. M., and K. Ritland. 2005. Post-pollination mechanisms pro-  
792 moting outcrossing in a self-fertile conifer, *Thuja plicata* (cupressaceae).  
793 *Canadian Journal of Botany* 83:335–342.
- 794 Porcher, E., and R. Lande. 2005. Reproductive compensation in the evolu-  
795 tion of plant mating systems. *New Phytologist* 166:673–684.
- 796 ———. 2016. Inbreeding depression under mixed outcrossing, self-  
797 fertilization and sib-mating. *BMC Evolutionary Biology* 16:105.
- 798 R Core Team. 2020. *R: A Language and Environment for Statistical Com-*  
799 *puting*. R Foundation for Statistical Computing, Vienna, Austria.
- 800 Raherison, E., P. Rigault, S. Caron, P.-L. Poulin, B. Boyle, J.-P. Verta,  
801 I. Giguère, C. Bomal, J. Bohlmann, and J. MacKay. 2012. Transcriptome  
802 profiling in conifers and the PiceaGenExpress database show patterns

- 803 of diversification within gene families and interspecific conservation in  
804 vascular gene expression. *BMC Genomics* 13:434.
- 805 Rhoades, M. M. 1942. Preferential segregation in maize. *Genetics* 27:395–  
806 407.
- 807 Sakai, S. 2019. Maintenance of high inbreeding depression in selfing popu-  
808 lations: Effects of coupling of early- and Late-Acting mutations. *bioRxiv*  
809 page 748699.
- 810 Sarvas, R. 1962. Investigations on the flowering and seed crop of *Pinus*  
811 *silvestris*. Metsätieteellisen tutkimuslaitoksen julkaisuja .
- 812 Saxton, W. T. 1934. Notes on conifers: IX. the ovule and embryogeny of  
813 widdringtonia. *Annals of Botany* 48:429–431.
- 814 Schnarf, K. 1937. Anatomie der Gymnospermen-Samen, vol. 10. Gebr.  
815 Borntraeger.
- 816 Sorensen, F. C. 1982. The roles of polyembryony and embryo viability in  
817 the genetic system of conifers.
- 818 Wallace, B. 1968. Polymorphism, population size and genetic load,  
819 in “population biology and Evolution” (RC Lewontin, ed.) .
- 820 ———. 1975. Hard and soft selection revisited. *Evolution* 29:465–473.
- 821 Williams, C. G. 2007. Re-thinking the embryo lethal system within the  
822 pinaceae. *Canadian Journal of Botany* 85:667–677.
- 823 ———. 2008. Selfed embryo death in *Pinus taeda*: a phenotypic profile.  
824 *New Phytologist* 178:210–222.
- 825 Williams, C. G., and O. Savolainen. 1996. Inbreeding depression in conifers:  
826 Implications for breeding strategy. *Forest Science* 42:102–117.
- 827 Willson, M. F., and N. Burley. 1983. *Mate Choice in Plants: Tactics, Mech-*  
828 *anisms, and Consequences*. Princeton University Press.



Table S1: Slope of the relationship between selfing rate and mean embryo fitness after burn-ins for non-recessive variants. All t values are associated with 59 degrees of freedom.

| <b>h</b> | <b>s</b> | <b>estimate</b> | <b>lower 95% CI</b> | <b>upper 95% CI</b> | <b>t</b> | <b>p-value</b> |
|----------|----------|-----------------|---------------------|---------------------|----------|----------------|
| 0.5      | 0.1      | 0.054           | 0.031               | 0.076               | 4.719    | 0.000015       |
| 0.5      | 0.5      | 0.085           | 0.076               | 0.094               | 19.114   | <10-11         |
| 0.5      | 1        | 0.051           | 0.039               | 0.062               | 8.600    | <10-11         |
| 0.5      | uniform  | 0.082           | 0.072               | 0.091               | 16.413   | <10-11         |
| uniform  | 0.1      | 0.045           | 0.015               | 0.074               | 2.980    | 0.004203       |
| uniform  | 0.5      | 0.078           | 0.068               | 0.088               | 15.313   | <10-11         |
| uniform  | 1        | 0.065           | 0.055               | 0.076               | 12.021   | <10-11         |
| uniform  | uniform  | 0.083           | 0.074               | 0.091               | 19.445   | <10-11         |

Table S2: Effect of selection coefficient on mean fitness following burn in for non-recessive variants.

| <b>h</b> | <b>estimate</b> | <b><math>F_{3,225}</math></b> | <b>p-value</b> |
|----------|-----------------|-------------------------------|----------------|
| 0.5      | 0.054           | 1.39                          | 0.059          |
| uniform  | 0.083           | 2.52                          | 0.247          |



Table S3: The proportion of introductions of the polyembryony allele resulting in fixation.

| $p_{\text{self}}$ | $s$     | $h$       | All benefits     | Compensation     | Competition      | No benefit       |
|-------------------|---------|-----------|------------------|------------------|------------------|------------------|
| 0                 | uniform | uniform   | 0.1084 (n=5000)  | 0.1025 (n=10000) | 0.0041 (n=10000) | 0.0012 (n=10000) |
| 0                 | uniform | recessive | 0.089 (n=5000)   | 0.08937 (n=9500) | 0.00027 (n=7500) | 0.00027 (n=7500) |
| 0                 | uniform | additive  | 0.1058 (n=5000)  | 0.1038 (n=10000) | 0.0056 (n=10000) | 7e-04 (n=10000)  |
| 0                 | 0.1     | uniform   | 0.129 (n=5000)   | 0.131 (n=10000)  | 0.0017 (n=10000) | 2e-04 (n=10000)  |
| 0                 | 0.1     | recessive | 0.09517 (n=6000) | 0.10129 (n=7000) | 0.00013 (n=7500) | 0 (n=6500)       |
| 0                 | 0.1     | additive  | 0.1306 (n=5000)  | 0.128 (n=10000)  | 0.001 (n=10000)  | 1e-04 (n=10000)  |
| 0                 | 0.5     | uniform   | 0.1128 (n=5000)  | 0.0997 (n=10000) | 0.0051 (n=10000) | 4e-04 (n=10000)  |
| 0                 | 0.5     | recessive | 0.095 (n=5000)   | 0.0885 (n=10000) | 4e-04 (n=7500)   | 0.00031 (n=6500) |
| 0                 | 0.5     | additive  | 0.1028 (n=5000)  | 0.1037 (n=10000) | 0.0049 (n=10000) | 4e-04 (n=10000)  |
| 0                 | 1       | uniform   | 0.0844 (n=5000)  | 0.0875 (n=10000) | 0.0049 (n=10000) | 0.001 (n=10000)  |
| 0                 | 1       | recessive | 0.0792 (n=5000)  | 0.0817 (n=10000) | 0.00042 (n=9500) | 0.00012 (n=8500) |
| 0                 | 1       | additive  | 0.0874 (n=5000)  | 0.077 (n=10000)  | 0.0092 (n=10000) | 1e-04 (n=10000)  |
| 0.2               | uniform | uniform   | 0.0946 (n=5000)  | 0.0885 (n=10000) | 0.0033 (n=10000) | 2e-04 (n=10000)  |
| 0.2               | uniform | recessive | 0.1398 (n=5000)  | 0.1539 (n=10000) | 0.00462 (n=6500) | 0 (n=9000)       |
| 0.2               | uniform | additive  | 0.0952 (n=5000)  | 0.0901 (n=10000) | 0.0054 (n=10000) | 2e-04 (n=10000)  |

| $p_{\text{self}}$ | $s$     | $h$       | All benefits     | Compensation     | Competition      | No benefit       |
|-------------------|---------|-----------|------------------|------------------|------------------|------------------|
| 0.2               | 0.1     | uniform   | 0.1178 (n=5000)  | 0.1211 (n=10000) | 0.0015 (n=10000) | 3e-04 (n=10000)  |
| 0.2               | 0.1     | recessive | 0.14436 (n=5500) | 0.138 (n=6000)   | 0.01154 (n=6500) | 0 (n=7000)       |
| 0.2               | 0.1     | additive  | 0.1164 (n=5000)  | 0.1258 (n=10000) | 0.0028 (n=10000) | 2e-04 (n=10000)  |
| 0.2               | 0.5     | uniform   | 0.0912 (n=5000)  | 0.089 (n=10000)  | 0.0048 (n=10000) | 5e-04 (n=10000)  |
| 0.2               | 0.5     | recessive | 0.154 (n=5000)   | 0.1427 (n=10000) | 0.00322 (n=9000) | 0 (n=8500)       |
| 0.2               | 0.5     | additive  | 0.0884 (n=5000)  | 0.0826 (n=10000) | 0.0041 (n=10000) | 5e-04 (n=10000)  |
| 0.2               | 1       | uniform   | 0.0808 (n=5000)  | 0.0672 (n=10000) | 0.0055 (n=10000) | 4e-04 (n=10000)  |
| 0.2               | 1       | recessive | 0.1428 (n=5000)  | 0.1378 (n=10000) | 0.00056 (n=9000) | 0.00084 (n=9500) |
| 0.2               | 1       | additive  | 0.0746 (n=5000)  | 0.0669 (n=10000) | 0.0062 (n=10000) | 6e-04 (n=10000)  |
| 0.4               | uniform | uniform   | 0.0762 (n=5000)  | 0.0736 (n=10000) | 0.004 (n=10000)  | 2e-04 (n=10000)  |
| 0.4               | uniform | recessive | 0.1598 (n=5000)  | 0.1534 (n=10000) | 0.0086 (n=10000) | 0.00021 (n=9500) |
| 0.4               | uniform | additive  | 0.0824 (n=5000)  | 0.0738 (n=10000) | 0.0048 (n=10000) | 5e-04 (n=10000)  |
| 0.4               | 0.1     | uniform   | 0.105 (n=5000)   | 0.109 (n=10000)  | 0.0017 (n=10000) | 1e-04 (n=10000)  |
| 0.4               | 0.1     | recessive | 0.131 (n=5000)   | 0.1275 (n=10000) | 0.00778 (n=9000) | 0 (n=8500)       |
| 0.4               | 0.1     | additive  | 0.1086 (n=5000)  | 0.103 (n=10000)  | 0.0028 (n=10000) | 5e-04 (n=10000)  |
| 0.4               | 0.5     | uniform   | 0.071 (n=5000)   | 0.0681 (n=10000) | 0.0053 (n=10000) | 3e-04 (n=10000)  |

| $p_{\text{self}}$ | $s$     | $h$       | All benefits    | Compensation     | Competition      | No benefit      |
|-------------------|---------|-----------|-----------------|------------------|------------------|-----------------|
| 0.4               | 0.5     | recessive | 0.1672 (n=5000) | 0.1617 (n=10000) | 0.0107 (n=10000) | 9e-04 (n=10000) |
| 0.4               | 0.5     | additive  | 0.0714 (n=5000) | 0.0718 (n=10000) | 0.0083 (n=10000) | 5e-04 (n=10000) |
| 0.4               | 1       | uniform   | 0.0542 (n=5000) | 0.0547 (n=10000) | 0.0066 (n=10000) | 0 (n=10000)     |
| 0.4               | 1       | recessive | 0.1468 (n=5000) | 0.149 (n=10000)  | 5e-04 (n=10000)  | 4e-04 (n=10000) |
| 0.4               | 1       | additive  | 0.0626 (n=5000) | 0.0532 (n=10000) | 0.0074 (n=10000) | 8e-04 (n=10000) |
| 0.6               | uniform | uniform   | 0.0576 (n=5000) | 0.0578 (n=10000) | 0.0043 (n=10000) | 7e-04 (n=10000) |
| 0.6               | uniform | recessive | 0.0702 (n=5000) | 0.0672 (n=10000) | 0.0013 (n=10000) | 7e-04 (n=10000) |
| 0.6               | uniform | additive  | 0.0618 (n=5000) | 0.058 (n=10000)  | 0.0057 (n=10000) | 5e-04 (n=10000) |
| 0.6               | 0.1     | uniform   | 0.0886 (n=5000) | 0.0917 (n=10000) | 0.0021 (n=10000) | 3e-04 (n=10000) |
| 0.6               | 0.1     | recessive | 0.0938 (n=5000) | 0.1021 (n=10000) | 2e-04 (n=10000)  | 5e-04 (n=10000) |
| 0.6               | 0.1     | additive  | 0.0906 (n=5000) | 0.091 (n=10000)  | 0.0036 (n=10000) | 2e-04 (n=10000) |
| 0.6               | 0.5     | uniform   | 0.0546 (n=5000) | 0.0512 (n=10000) | 0.006 (n=10000)  | 7e-04 (n=10000) |
| 0.6               | 0.5     | recessive | 0.0634 (n=5000) | 0.0607 (n=10000) | 0.0031 (n=10000) | 6e-04 (n=10000) |
| 0.6               | 0.5     | additive  | 0.0594 (n=5000) | 0.0557 (n=10000) | 0.006 (n=10000)  | 2e-04 (n=10000) |
| 0.6               | 1       | uniform   | 0.0488 (n=5000) | 0.0399 (n=10000) | 0.0035 (n=10000) | 8e-04 (n=10000) |
| 0.6               | 1       | recessive | 0.048 (n=5000)  | 0.0417 (n=10000) | 4e-04 (n=10000)  | 6e-04 (n=10000) |

| $p_{\text{self}}$ | s       | h         | All benefits    | Compensation     | Competition      | No benefit       |
|-------------------|---------|-----------|-----------------|------------------|------------------|------------------|
| 0.6               | 1       | additive  | 0.0516 (n=5000) | 0.0445 (n=10000) | 0.0053 (n=10000) | 4e-04 (n=10000)  |
| 0.8               | uniform | uniform   | 0.0374 (n=5000) | 0.0433 (n=10000) | 0.0035 (n=10000) | 4e-04 (n=10000)  |
| 0.8               | uniform | recessive | 0.042 (n=5000)  | 0.0455 (n=10000) | 0.0023 (n=10000) | 2e-04 (n=10000)  |
| 0.8               | uniform | additive  | 0.042 (n=5000)  | 0.0416 (n=10000) | 0.0026 (n=10000) | 5e-04 (n=10000)  |
| 0.8               | 0.1     | uniform   | 0.0658 (n=5000) | 0.0665 (n=10000) | 0.0022 (n=10000) | 5e-04 (n=10000)  |
| 0.8               | 0.1     | recessive | 0.0678 (n=5000) | 0.0747 (n=10000) | 7e-04 (n=10000)  | 4e-04 (n=10000)  |
| 0.8               | 0.1     | additive  | 0.066 (n=5000)  | 0.066 (n=10000)  | 0.0018 (n=10000) | 4e-04 (n=10000)  |
| 0.8               | 0.5     | uniform   | 0.0386 (n=5000) | 0.0354 (n=10000) | 0.0042 (n=10000) | 0.0012 (n=10000) |
| 0.8               | 0.5     | recessive | 0.0366 (n=5000) | 0.0323 (n=10000) | 0.0023 (n=10000) | 3e-04 (n=10000)  |
| 0.8               | 0.5     | additive  | 0.0404 (n=5000) | 0.0375 (n=10000) | 0.0034 (n=10000) | 1e-04 (n=10000)  |
| 0.8               | 1       | uniform   | 0.0308 (n=5000) | 0.0301 (n=10000) | 0.0032 (n=10000) | 3e-04 (n=10000)  |
| 0.8               | 1       | recessive | 0.033 (n=5000)  | 0.0285 (n=10000) | 4e-04 (n=10000)  | 5e-04 (n=10000)  |
| 0.8               | 1       | additive  | 0.0388 (n=5000) | 0.0322 (n=10000) | 0.0041 (n=10000) | 2e-04 (n=10000)  |
| 1                 | uniform | uniform   | 0.0132 (n=5000) | 0.0138 (n=10000) | 0.0011 (n=10000) | 6e-04 (n=10000)  |
| 1                 | uniform | recessive | 0.0102 (n=5000) | 0.0072 (n=10000) | 8e-04 (n=10000)  | 2e-04 (n=10000)  |
| 1                 | uniform | additive  | 0.013 (n=5000)  | 0.0127 (n=10000) | 0.0013 (n=10000) | 4e-04 (n=10000)  |

| $p_{\text{self}}$ | $s$ | $h$       | All benefits    | Compensation     | Competition      | No benefit      |
|-------------------|-----|-----------|-----------------|------------------|------------------|-----------------|
| 1                 | 0.1 | uniform   | 0.0242 (n=5000) | 0.0223 (n=10000) | 4e-04 (n=10000)  | 2e-04 (n=10000) |
| 1                 | 0.1 | recessive | 0.0214 (n=5000) | 0.0235 (n=10000) | 9e-04 (n=10000)  | 8e-04 (n=10000) |
| 1                 | 0.1 | additive  | 0.0196 (n=5000) | 0.0151 (n=10000) | 5e-04 (n=10000)  | 3e-04 (n=10000) |
| 1                 | 0.5 | uniform   | 0.0148 (n=5000) | 0.0154 (n=10000) | 0.0021 (n=10000) | 6e-04 (n=10000) |
| 1                 | 0.5 | recessive | 0.012 (n=5000)  | 0.0084 (n=10000) | 0.0028 (n=10000) | 5e-04 (n=10000) |
| 1                 | 0.5 | additive  | 0.0168 (n=5000) | 0.0161 (n=10000) | 0.0023 (n=10000) | 2e-04 (n=10000) |
| 1                 | 1   | uniform   | 0.023 (n=5000)  | 0.0228 (n=10000) | 0.0023 (n=10000) | 6e-04 (n=10000) |
| 1                 | 1   | recessive | 0.0268 (n=5000) | 0.0267 (n=10000) | 8e-04 (n=10000)  | 6e-04 (n=10000) |
| 1                 | 1   | additive  | 0.0246 (n=5000) | 0.025 (n=10000)  | 0.0027 (n=10000) | 5e-04 (n=10000) |

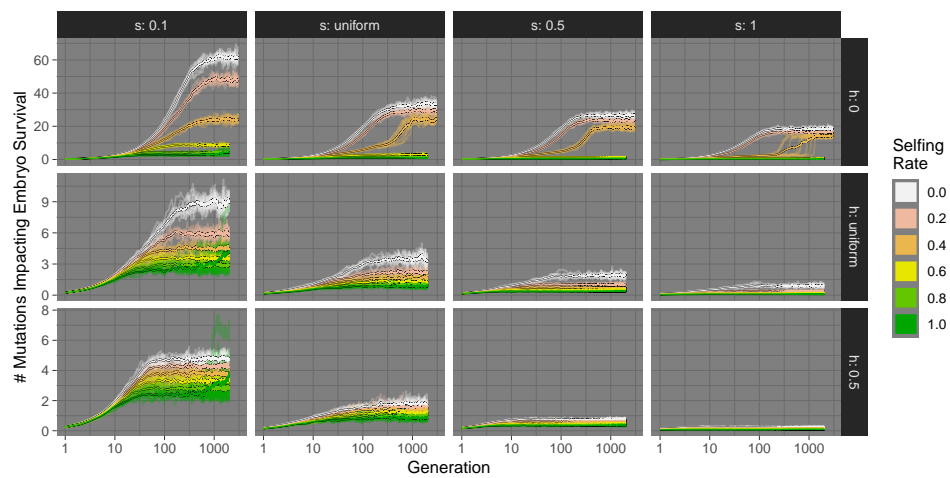

Figure S1: **Overview of the life cycle model:** The number of deleterious mutations impacting embryo fitness over time in burn in simulations, across selective ( $s$ ) and dominance ( $h$ ) coefficients, and selfing rates (on the x-axis).

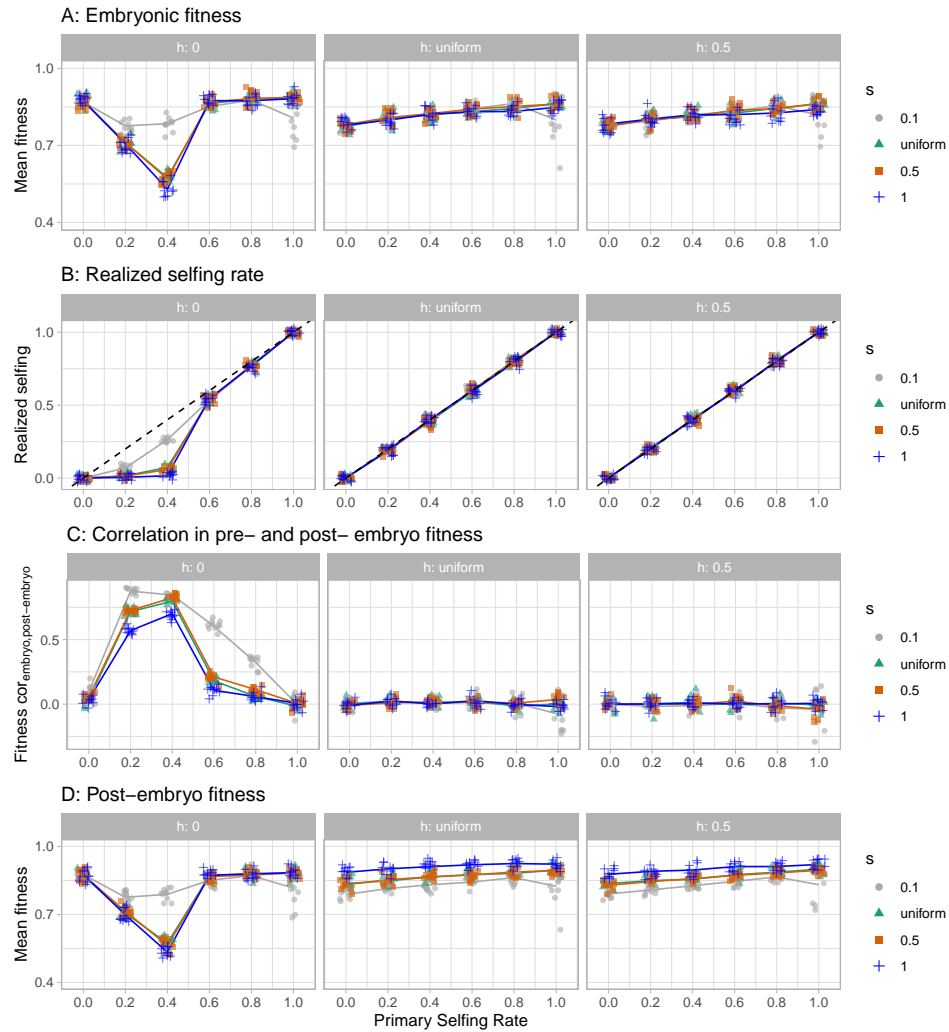

Figure S2: **Summaries of our simulated populations at equilibrium:** (A) The mean embryo fitness, (B) Realized selfing rate, (C) Correlation between embryo and postembryonic fitness, (D) Post-embryo fitness, across selective ( $s$ , colors and shapes) and dominance ( $h$ , facets) coefficients, and selfing rates (on the x-axis). The number of deleterious mutations impacting embryo fitness over time in burn in simulations, across selective ( $s$ ) and dominance ( $h$ ) coefficients, and selfing rates (on the x-axis).

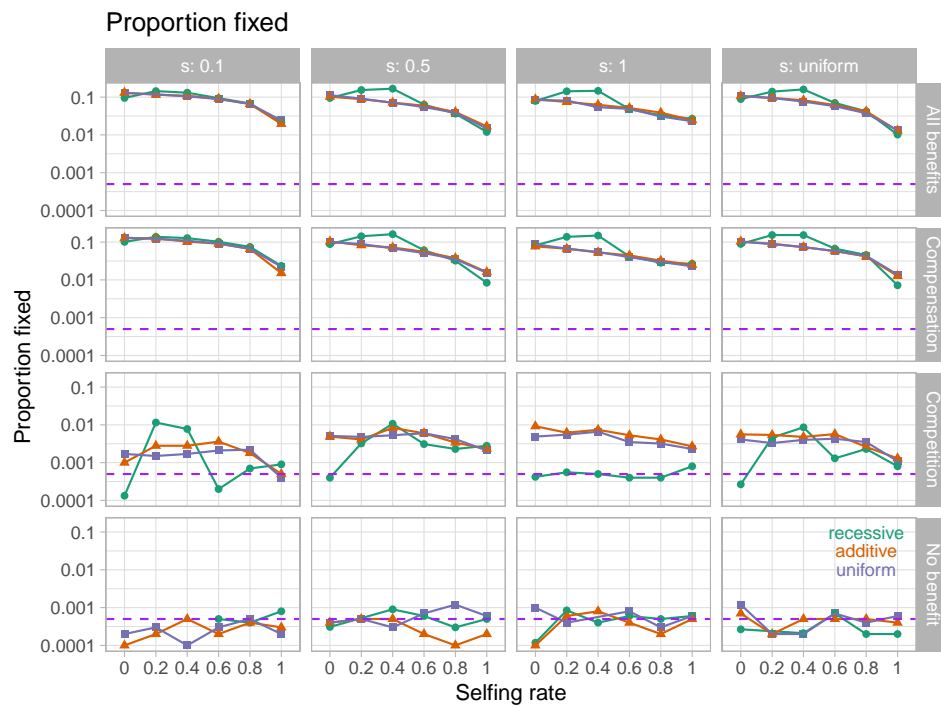

Figure S3: **Proportion of introductions resulting in fixation** as a function of selfing rate (x-axis), the benefit of polyembryony (rows), selection against new mutations (columns), and the dominance of new mutations (color). The purple line denotes neutral expectations. Note that fixation probabilities for additive mutations and those taking their value from a uniform distribution are very similar.



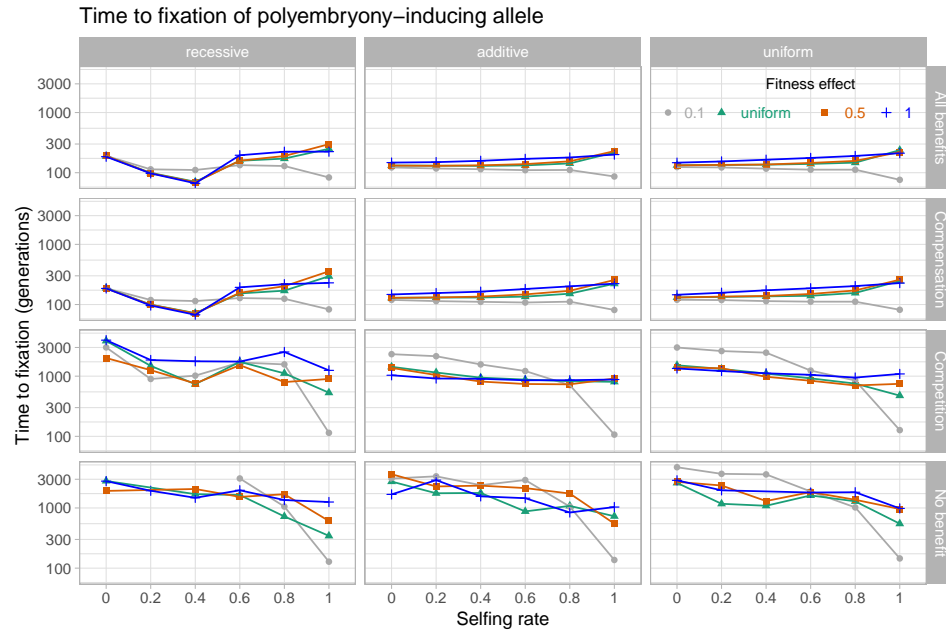

Figure S4: **Mean time to fixation** of the polyembryony allele across selective ( $s$ , colors and shapes) and dominance ( $h$ , faceted columns) coefficients, and selfing rates (on the x-axis), for each model (faceted rows).

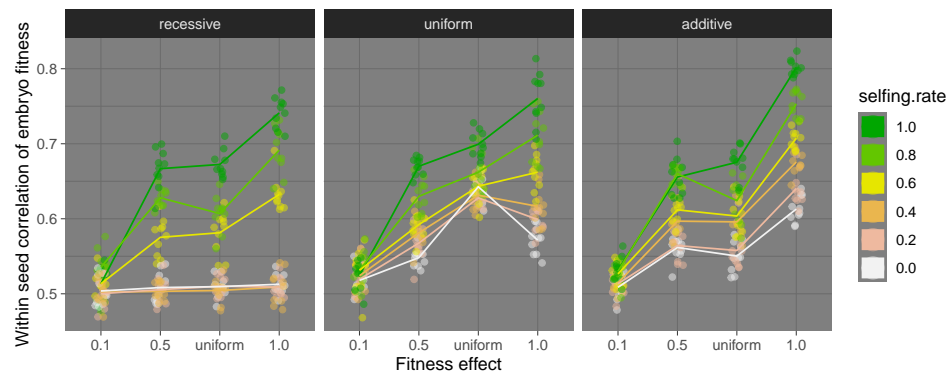

Figure S5: **Correlation in fitness** of the hypothetical two embryos in a seed, before polyembryony evolves as a function of the fitness effect of new mutations (on the x-axis), the selfing rate (color), and the dominance effect of new mutations (columns).
